# Supplementary material
Source: publisher figshare collection journal article supplement (https://frontiersin.figshare.com/ndownloader/files/34703821)
Supplement: Supplementary file [file 34703821]

## Supplementary Material

### Proteomics reveal the effect of exogenous electrons on electroactive *Escherichia coli*

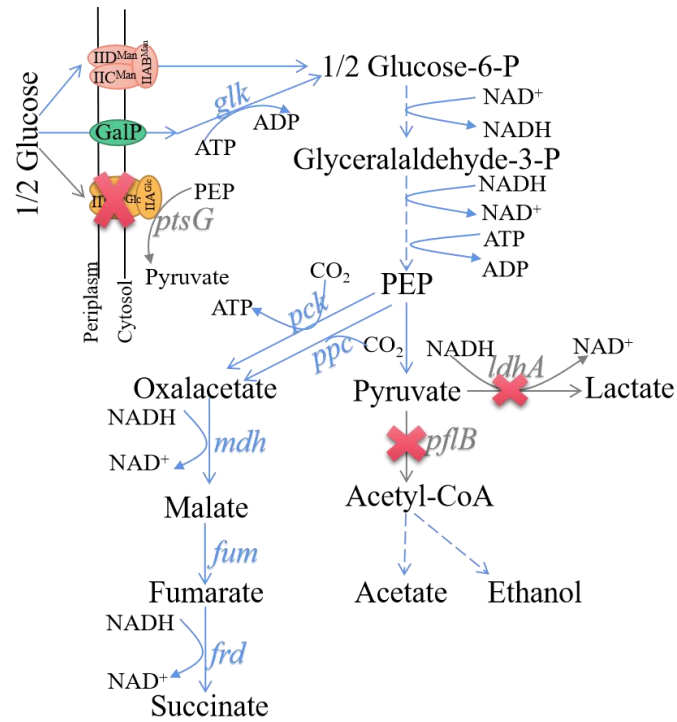

Figure S2 Central metabolic pathway of *E. coli* for succinate production in this work. PEP: phosphoenolpyruvate. Dashed lines represent multi-step reactions. Gene deletions are indicated in gray and crossed out.
